# Supplementary material for: Genome-wide analysis and expression profiling of the PIN auxin transporter gene family in soybean (Glycine max)
Source: PubMed Central journal article supplement (PMC4647520; doi:10.1186/s12864-015-2149-1), 2015-11-16
Supplement: 12864_2015_2149_MOESM1_ESM.pdf [file 12864_2015_2149_MOESM1_ESM.pdf]

**Table S1 *GmPINs* gene information**

| Gene name      | Locus ID      | Protein |          |      | Chromosome | Location (Mb) | Strand direction | Transmembrane helices | Subcellular localization |
|----------------|---------------|---------|----------|------|------------|---------------|------------------|-----------------------|--------------------------|
|                |               | Length  | MW (kDa) | PI   |            |               |                  |                       |                          |
| <i>GmPIN1a</i> | Glyma08g05900 | 603     | 66.039   | 8.52 | Gm08       | 4.21          | +                | 9                     | plas/chlo                |
| <i>GmPIN1b</i> | Glyma07g11550 | 605     | 66.192   | 8.52 | Gm07       | 9.74          | +                | 9                     | plas                     |
| <i>GmPIN1c</i> | Glyma09g30700 | 605     | 66.307   | 8.33 | Gm09       | 37.48         | -                | 9                     | plas                     |
| <i>GmPIN1d</i> | Glyma03g28130 | 597     | 64.260   | 9.04 | Gm03       | 36.01         | +                | 8                     | plas                     |
| <i>GmPIN1e</i> | Glyma19g30900 | 578     | 62.023   | 8.55 | Gm19       | 38.59         | +                | 8                     | plas                     |
| <i>GmPIN2a</i> | Glyma13g00390 | 642     | 69.746   | 9.07 | Gm13       | 0.14          | +                | 9                     | plas                     |
| <i>GmPIN2b</i> | Glyma17g06460 | 637     | 69.033   | 9    | Gm17       | 4.61          | +                | 9                     | plas                     |
| <i>GmPIN3a</i> | Glyma07g34190 | 665     | 72.117   | 7.84 | Gm07       | 39.10         | -                | 9                     | plas                     |
| <i>GmPIN3b</i> | Glyma20g01760 | 666     | 75.517   | 7.54 | Gm20       | 1.29          | -                | 10                    | plas                     |
| <i>GmPIN3c</i> | Glyma07g22340 | 608     | 66.335   | 7.5  | Gm07       | 23.72         | +                | 9                     | plas                     |
| <i>GmPIN3d</i> | Glyma09g20580 | 634     | 69.338   | 7.59 | Gm09       | 25.49         | +                | 10                    | plas                     |
| <i>GmPIN5a</i> | Glyma09g38700 | 377     | 41.460   | 7.59 | Gm09       | 44.00         | -                | 9                     | vacu                     |
| <i>GmPIN5b</i> | Glyma18g47630 | 369     | 40.656   | 8.02 | Gm18       | 57.23         | +                | 9                     | vacu                     |
| <i>GmPIN6a</i> | Glyma13g09030 | 478     | 52.123   | 7.29 | Gm13       | 10.03         |                  | 9                     | plas/vacu                |
| <i>GmPIN6b</i> | Glyma14g27900 | 531     | 85.120   | 8.62 | Gm14       | 34.23         | +                | 9                     | plas                     |
| <i>GmPIN8a</i> | Glyma05g23180 | 362     | 40.053   | 8.87 | Gm05       | 28.77         | +                | 8                     | chlo                     |
| <i>GmPIN8b</i> | Glyma17g16870 | 363     | 40.192   | 8.87 | Gm17       | 13.67         | -                | 8                     | chlo                     |
| <i>GmPIN8c</i> | Glyma09g37561 | 353     | 38.694   | 9.83 | Gm09       | 43.09         | +                | 8                     | chlo                     |
| <i>GmPIN8d</i> | Glyma18g49080 | 359     | 39.486   | 9.74 | Gm18       | 58.47         | -                | 8                     | plas                     |
| <i>GmPIN9a</i> | Glyma09g06970 | 443     | 49.504   | 9.07 | Gm09       | 5.80          | -                | 8                     | plas                     |
| <i>GmPIN9b</i> | Glyma15g18241 | 469     | 51.749   | 9.18 | Gm15       | 14.90         | -                | 5                     | cyto                     |
| <i>GmPIN9c</i> | Glyma09g13500 | 460     | 81.070   | 9.14 | Gm09       | 14.98         | +                | 9                     | plas                     |
| <i>GmPIN9d</i> | Glyma15g25690 | 492     | 54.290   | 8.02 | Gm15       | 27.23         | +                | 9                     | plas                     |
