# Supplementary material for: Genome-wide analysis and expression profiling of the PIN auxin transporter gene family in soybean (Glycine max)
Source: PubMed Central journal article supplement (PMC4647520; doi:10.1186/s12864-015-2149-1), 2015-11-16
Supplement: 12864_2015_2149_MOESM2_ESM.pdf [file 12864_2015_2149_MOESM2_ESM.pdf]

GmPIN2a 100.0% MTRGDDYVWVA VPLYVAMILAY SVWKKIF SPQCSCGINRVAFA PLSFHFISNNPY MNYHFIADSLQKVLLGAL LWMFTTRKGS ID  
GmPIN2b 96.7% MTRGDDYVWVA VPLYVAMILAY SVWKKIF SPQCSCGINRVAFA PLSFHFISNNPY MNYHFIADSLQKVLLGAL LWMFTTRKGS ID  
GmPIN1b 55.9% MTRLDYVWVA VPLYVAMILAY SVWKKIF SPQCSCGINRVAFA PLSFHFISNNPY MNLRFIADSLQK I ILLVAVNSNIARRGGL IE  
GmPIN1c 56.3% MTRLDYVWVA VPLYVAMILAY SVWKKIF SPQCSCGINRVAFA PLSFHFISNNPY MNLRFIADSLQK I ILLVAVNSNIARRGGL IE  
GmPIN1a 55.7% MTRLDYVWVA VPLYVAMILAY SVWKKIF SPQCSCGINRVAFA PLSFHFISNNPY MNLRFIADSLQK I ILLVAVNSNIARRGGL IE  
GmPIN1d 54.6% MTRLDYVWVA VPLYVAMILAY SVWKKIF SPQCSCGINRVAFA PLSFHFISNNPY MNLRFIADSLQK I ILLVAVNSNIARRGGL IE  
GmPIN1e 52.5% MTRLDYVWVA VPLYVAMILAY SVWKKIF SPQCSCGINRVAFA PLSFHFISNNPY MNLRFIADSLQK I ILLVAVNSNIARRGGL IE  
GmPIN3a 53.5% MTRWGDYVWVA VPLYVAMILAY SVWKKIF SPQCSCGINRVAFA PLSFHFISNNPY MNLRFIADSLQK I ILLVAVNSNIARRGGL IE  
GmPIN3b 53.9% MTRWGDYVWVA VPLYVAMILAY SVWKKIF SPQCSCGINRVAFA PLSFHFISNNPY MNLRFIADSLQK I ILLVAVNSNIARRGGL IE  
GmPIN3c 50.8% MTRWGDYVWVA VPLYVAMILAY SVWKKIF SPQCSCGINRVAFA PLSFHFISNNPY MNLRFIADSLQK I ILLVAVNSNIARRGGL IE  
GmPIN3d 54.7% MTRWGDYVWVA VPLYVAMILAY SVWKKIF SPQCSCGINRVAFA PLSFHFISNNPY MNLRFIADSLQK I ILLVAVNSNIARRGGL IE  
GmPIN8a 27.8% MTRSLADYVWVA VPLYVAMILAY SVWKKIF SPQCSCGINRVAFA PLSFHFISNNPY MSLKLVADVWVKLAFVLEA IRIKIRGGGL IE  
GmPIN8b 27.5% MTRSLADYVWVA VPLYVAMILAY SVWKKIF SPQCSCGINRVAFA PLSFHFISNNPY MSLKLVADVWVKLAFVLEA IRIKIRGGGL IE  
GmPIN8c 28.9% MTRSLADYVWVA VPLYVAMILAY SVWKKIF SPQCSCGINRVAFA PLSFHFISNNPY MSLKLVADVWVKLAFVLEA IRIKIRGGGL IE  
GmPIN8d 28.9% MTRSLADYVWVA VPLYVAMILAY SVWKKIF SPQCSCGINRVAFA PLSFHFISNNPY MSLKLVADVWVKLAFVLEA IRIKIRGGGL IE  
GmPIN6a 38.6% MTRGDDYVWVA VPLYVAMILAY SVWKKIF SPQCSCGINRVAFA PLSFHFISNNPY MDAKFIADSLQK I ILLVAVNSNIARRGGL IE  
GmPIN6b 43.3% MTRGDDYVWVA VPLYVAMILAY SVWKKIF SPQCSCGINRVAFA PLSFHFISNNPY MDAKFIADSLQK I ILLVAVNSNIARRGGL IE  
GmPIN5a 24.5% MTRGDDYVWVA VPLYVAMILAY SVWKKIF SPQCSCGINRVAFA PLSFHFISNNPY MDAKFIADSLQK I ILLVAVNSNIARRGGL IE  
GmPIN5b 23.9% MTRGDDYVWVA VPLYVAMILAY SVWKKIF SPQCSCGINRVAFA PLSFHFISNNPY MDAKFIADSLQK I ILLVAVNSNIARRGGL IE  
GmPIN9c 42.9% MTRDREYVWVA VPLYVAMILAY SVWKKIF SPQCSCGINRVAFA PLSFHFISNNPY MNYHFIADSLQKVLLGAL LWMFTTRKGS ID  
GmPIN9d 44.6% MTRDREYVWVA VPLYVAMILAY SVWKKIF SPQCSCGINRVAFA PLSFHFISNNPY MNYHFIADSLQKVLLGAL LWMFTTRKGS ID  
GmPIN9a 46.0% MTRGDDYVWVA VPLYVAMILAY SVWKKIF SPQCSCGINRVAFA PLSFHFISNNPY MNLRFIADSLQK I ILLVAVNSNIARRGGL IE  
GmPIN9b 26.7% MTRGDDYVWVA VPLYVAMILAY SVWKKIF SPQCSCGINRVAFA PLSFHFISNNPY MNLRFIADSLQK I ILLVAVNSNIARRGGL IE  
consensus/100% MTRGDDYVWVA VPLYVAMILAY SVWKKIF SPQCSCGINRVAFA PLSFHFISNNPY MNYHFIADSLQKVLLGAL LWMFTTRKGS ID

GmPIN2a 100.0% WITTFISLSTLPNTLVWG PPLKAMYGDSSGLAVQVVLQCIWYLLDFEFERGA KLLITEQFPE-TAGSITSRFVSDSVVSLNGRE-PLQTDABIG  
GmPIN2b 96.7% WITTFISLSTLPNTLVWG PPLKAMYGDSSGLAVQVVLQCIWYLLDFEFERGA KLLITEQFPE-TAGSITSRFVSDSVVSLNGRE-PLQTDABIG  
GmPIN1b 55.9% WITTFISLSTLPNTLVWG PPLKAMYGDSSGLAVQVVLQCIWYLLDFEFERGA KLLITEQFPE-TAGSITSRFVSDSVVSLNGRE-PLQTDABIG  
GmPIN1c 56.3% WITTFISLSTLPNTLVWG PPLKAMYGDSSGLAVQVVLQCIWYLLDFEFERGA KLLITEQFPE-TAGSITSRFVSDSVVSLNGRE-PLQTDABIG  
GmPIN1a 55.7% WITTFISLSTLPNTLVWG PPLKAMYGDSSGLAVQVVLQCIWYLLDFEFERGA KLLITEQFPE-TAGSITSRFVSDSVVSLNGRE-PLQTDABIG  
GmPIN1d 54.6% WITTFISLSTLPNTLVWG PPLKAMYGDSSGLAVQVVLQCIWYLLDFEFERGA KLLITEQFPE-TAGSITSRFVSDSVVSLNGRE-PLQTDABIG  
GmPIN1e 52.5% WITTFISLSTLPNTLVWG PPLKAMYGDSSGLAVQVVLQCIWYLLDFEFERGA KLLITEQFPE-TAGSITSRFVSDSVVSLNGRE-PLQTDABIG  
GmPIN3a 53.5% WITTFISLSTLPNTLVWG PPLKAMYGDSSGLAVQVVLQCIWYLLDFEFERGA KLLITEQFPE-TAGSITSRFVSDSVVSLNGRE-PLQTDABIG  
GmPIN3b 53.9% WITTFISLSTLPNTLVWG PPLKAMYGDSSGLAVQVVLQCIWYLLDFEFERGA KLLITEQFPE-TAGSITSRFVSDSVVSLNGRE-PLQTDABIG  
GmPIN3c 50.8% WITTFISLSTLPNTLVWG PPLKAMYGDSSGLAVQVVLQCIWYLLDFEFERGA KLLITEQFPE-TAGSITSRFVSDSVVSLNGRE-PLQTDABIG  
GmPIN3d 54.7% WITTFISLSTLPNTLVWG PPLKAMYGDSSGLAVQVVLQCIWYLLDFEFERGA KLLITEQFPE-TAGSITSRFVSDSVVSLNGRE-PLQTDABIG  
GmPIN8a 27.8% WITTFISLSTLPNTLVWG PPLKAMYGDSSGLAVQVVLQCIWYLLDFEFERGA KLLITEQFPE-TAGSITSRFVSDSVVSLNGRE-PLQTDABIG  
GmPIN8b 27.5% WITTFISLSTLPNTLVWG PPLKAMYGDSSGLAVQVVLQCIWYLLDFEFERGA KLLITEQFPE-TAGSITSRFVSDSVVSLNGRE-PLQTDABIG  
GmPIN8c 28.9% WITTFISLSTLPNTLVWG PPLKAMYGDSSGLAVQVVLQCIWYLLDFEFERGA KLLITEQFPE-TAGSITSRFVSDSVVSLNGRE-PLQTDABIG  
GmPIN8d 28.9% WITTFISLSTLPNTLVWG PPLKAMYGDSSGLAVQVVLQCIWYLLDFEFERGA KLLITEQFPE-TAGSITSRFVSDSVVSLNGRE-PLQTDABIG  
GmPIN6a 38.6% WITTFISLSTLPNTLVWG PPLKAMYGDSSGLAVQVVLQCIWYLLDFEFERGA KLLITEQFPE-TAGSITSRFVSDSVVSLNGRE-PLQTDABIG  
GmPIN6b 43.3% WITTFISLSTLPNTLVWG PPLKAMYGDSSGLAVQVVLQCIWYLLDFEFERGA KLLITEQFPE-TAGSITSRFVSDSVVSLNGRE-PLQTDABIG  
GmPIN5a 24.5% WITTFISLSTLPNTLVWG PPLKAMYGDSSGLAVQVVLQCIWYLLDFEFERGA KLLITEQFPE-TAGSITSRFVSDSVVSLNGRE-PLQTDABIG  
GmPIN5b 23.9% WITTFISLSTLPNTLVWG PPLKAMYGDSSGLAVQVVLQCIWYLLDFEFERGA KLLITEQFPE-TAGSITSRFVSDSVVSLNGRE-PLQTDABIG  
GmPIN9c 42.9% WITTFISLSTLPNTLVWG PPLKAMYGDSSGLAVQVVLQCIWYLLDFEFERGA KLLITEQFPE-TAGSITSRFVSDSVVSLNGRE-PLQTDABIG  
GmPIN9d 44.6% WITTFISLSTLPNTLVWG PPLKAMYGDSSGLAVQVVLQCIWYLLDFEFERGA KLLITEQFPE-TAGSITSRFVSDSVVSLNGRE-PLQTDABIG  
GmPIN9a 46.0% WITTFISLSTLPNTLVWG PPLKAMYGDSSGLAVQVVLQCIWYLLDFEFERGA KLLITEQFPE-TAGSITSRFVSDSVVSLNGRE-PLQTDABIG  
GmPIN9b 26.7% WITTFISLSTLPNTLVWG PPLKAMYGDSSGLAVQVVLQCIWYLLDFEFERGA KLLITEQFPE-TAGSITSRFVSDSVVSLNGRE-PLQTDABIG  
consensus/100% WITTFISLSTLPNTLVWG PPLKAMYGDSSGLAVQVVLQCIWYLLDFEFERGA KLLITEQFPE-TAGSITSRFVSDSVVSLNGRE-PLQTDABIG

GmPIN2a 100.0% EDGKLVHVVRKSAASSMISSFNKSHLT---SMTPRASNLTGVEIYSVQSSREPTPRGSSFNQDFYAMFASKAPSPKHGYTNSFQSN-GGIGDVISLQS  
GmPIN2b 96.7% EDGKLVHVVRKSAASSMISSFNKSHLT---SMTPRASNLTGVEIYSVQSSREPTPRGSSFNQDFYAMFASKAPSPKHGYTNSFQSN-GGIGDVISLQS  
GmPIN1b 55.9% EDGKLVHVVRKSAASSRSDIFSRSSQGL---SSTPRPSNLTGAEIYSLQSSRNPTPRGSSFNHDFYSMMAAGGRNSNFGASDVYGLS-----A  
GmPIN1c 56.3% EDGKLVHVVRKSAASSRSDIFSRSSQGL---SSTPRPSNLTGAEIYSLQSSRNPTPRGSSFNHDFYSMMAAGGRNSNFGASDVYGLS-----A  
GmPIN1a 55.7% EDGKLVHVVRKSAASSRSDIFSRSSQGL---SSTPRPSNLTGAEIYSLQSSRNPTPRGSSFNHDFYSMMAAGGRNSNFGASDVYGLS-----A  
GmPIN1d 54.6% EDGKLVHVVRKSAASSRSDIFSRSSQGL---SSTPRPSNLTGAEIYSLQSSRNPTPRGSSFNHDFYSMMAAGGRNSNFGASDVYGLS-----A  
GmPIN1e 52.5% DDGKLVHVVRKSAASSRSDIFSRSSQGL---SSTPRPSNLTGAEIYSLQSSRNPTPRGSSFNHDFYSMMAAGGRNSNFGASDVYGLS-----A  
GmPIN3a 53.5% DDGKLVHVVRKSAASSRSDIFSRSSQGL---SSTPRPSNLTGAEIYSLQSSRNPTPRGSSFNHDFYSMMAAGGRNSNFGASDVYGLS-----A  
GmPIN3b 53.9% DDGKLVHVVRKSAASSRSDIFSRSSQGL---SSTPRPSNLTGAEIYSLQSSRNPTPRGSSFNHDFYSMMAAGGRNSNFGASDVYGLS-----A  
GmPIN3c 50.8% DDGKLVHVVRKSAASSRSDIFSRSSQGL---SSTPRPSNLTGAEIYSLQSSRNPTPRGSSFNHDFYSMMAAGGRNSNFGASDVYGLS-----A  
GmPIN3d 54.7% DDGKLVHVVRKSAASSRSDIFSRSSQGL---SSTPRPSNLTGAEIYSLQSSRNPTPRGSSFNHDFYSMMAAGGRNSNFGASDVYGLS-----A  
GmPIN8a 27.8% -----SFMTPRPSNLTGAEIYSLQSSRNPTPRGSSFNHDFYSMMAAGGRNSNFGASDVYGLS-----A  
GmPIN8b 27.5% -----SFMTPRPSNLTGAEIYSLQSSRNPTPRGSSFNHDFYSMMAAGGRNSNFGASDVYGLS-----A  
GmPIN8c 28.9% -----SFMTPRPSNLTGAEIYSLQSSRNPTPRGSSFNHDFYSMMAAGGRNSNFGASDVYGLS-----A  
GmPIN8d 28.9% -----SFMTPRPSNLTGAEIYSLQSSRNPTPRGSSFNHDFYSMMAAGGRNSNFGASDVYGLS-----A  
GmPIN6a 38.6% DHGRIHVRIRRSVSSAPETNSSIGGNT---TVVTPRQSNLSNADIFSIINTPLHLHEGGGNT---AAGASPHLSGYASSDAYSLQ-----AC  
GmPIN6b 43.3% DQGRIRVRIRRSVSSAPETNSSIGGNT---AVVTPRPSNLSNADIFSIINTPLHLHEGGGNT---AAGASPHLSGYASSDAYSLQ-----AC  
GmPIN5a 24.5% -----SFMTPRPSNLTGAEIYSLQSSRNPTPRGSSFNHDFYSMMAAGGRNSNFGASDVYGLS-----A  
GmPIN5b 23.9% -----SFMTPRPSNLTGAEIYSLQSSRNPTPRGSSFNHDFYSMMAAGGRNSNFGASDVYGLS-----A  
GmPIN9c 42.9% ENGELHVMVRSSSLKI---FNRSTEMCAHL---PKRRASSFSTLIDLQ-----AKKKGGE-----AKKKGGE  
GmPIN9d 44.6% ENGELHVMVRSSSFLND---SPNCSTSNHCSEAEICMSQRSLSFNTRDLKREGSKEEMSKI DQEKMSRKD-----AC  
GmPIN9a 46.0% ENQQLHVMVRSSMSRVS---MASSFHYSYSTGVEIYFPFSR---GVTVPAPNPFSSGLTQVAVNSNQTQP---QPQPQIQQAQVAPP-PQ  
GmPIN9b 26.7% PSQRASSGASGFEEWMLNNKHEKRF---SRKNTVSDDLVISPSPKPIKFLGNSGGQRNKDMK-----AKKKGGE-----AKKKGGE  
consensus/100% EDGKLVHVVRKSAASSMISSFNKSHLT---SMTPRASNLTGVEIYSVQSSREPTPRGSSFNQDFYAMFASKAPSPKHGYTNSFQSN-GGIGDVISLQS

GmPIN2a 100.0% SKGATPRTSNFEEMLKMKHKKRGRSSMSELFNGLVSSN---YPPNPMPFSGTSA-----GGP  
GmPIN2b 96.7% SKGATPRTSNFEEMLKMKHKKRGRSSMSELFNGLVSSN---YPPNPMPFSGTSA-----GGP  
GmPIN1b 55.9% SRGPTPRPSNYDEGD---GKPKFYHAA---GGTGHYAPNPMGFSPS-----NGSKSVAAANANA  
GmPIN1c 56.3% SRGPTPRPSNYDEGD---GKPKFYHAA---GGTGHYAPNPMGFSPS-----NGSKSVAAANANA  
GmPIN1a 55.7% SRGPTPRPSNYDEGD---GKPKFYHAA---GGTGHYAPNPMGFSPS-----NGSKSVAAANANA  
GmPIN1d 54.6% SRGPTPRPSNYDEGD---GKPKFYHAA---GGTGHYAPNPMGFSPS-----NGSKSVAAANANA  
GmPIN1e 52.5% SRQSNFGGDFEESG---GGMRVNG---GGVYGPANAGIFSPV-----AASK  
GmPIN3a 53.5% SFRQSNFGGDFEESG---GGMRVNG---GGVYGPANAGIFSPV-----AASK  
GmPIN3b 53.9% SRGVTPRPSNFEENGCSAGA---MQQQTSSPRFGYPAV---QTLPAAYPAPNPFSS---GLTQVAVNSNQTQP---QPQPQIQQAQVAPP-PQ  
GmPIN3c 50.8% SRGVTPRPSNFEENGCSAGA---MQQQTSSPRFGYPAV---QTLPAAYPAPNPFSS---GLTQVAVNSNQTQP---QPQPQIQQAQVAPP-PQ  
GmPIN3d 54.7% SRGVTPRPSNFEENGCSAGA---MQQQTSSPRFGYPAV---QTLPAAYPAPNPFSS---GLTQVAVNSNQTQP---QPQPQIQQAQVAPP-PQ  
GmPIN8a 27.8% -----SFMTPRPSNLTGAEIYSLQSSRNPTPRGSSFNHDFYSMMAAGGRNSNFGASDVYGLS-----A  
GmPIN8b 27.5% -----SFMTPRPSNLTGAEIYSLQSSRNPTPRGSSFNHDFYSMMAAGGRNSNFGASDVYGLS-----A  
GmPIN8c 28.9% -----SFMTPRPSNLTGAEIYSLQSSRNPTPRGSSFNHDFYSMMAAGGRNSNFGASDVYGLS-----A  
GmPIN8d 28.9% -----SFMTPRPSNLTGAEIYSLQSSRNPTPRGSSFNHDFYSMMAAGGRNSNFGASDVYGLS-----A  
GmPIN6a 38.6% ---PTPRASNFNEME-----AKKKGGE-----AKKKGGE  
GmPIN6b 43.3% ---PTPRASNFNEME-----AKKKGGE-----AKKKGGE  
GmPIN5a 24.5% -----SFMTPRPSNLTGAEIYSLQSSRNPTPRGSSFNHDFYSMMAAGGRNSNFGASDVYGLS-----A  
GmPIN5b 23.9% -----SFMTPRPSNLTGAEIYSLQSSRNPTPRGSSFNHDFYSMMAAGGRNSNFGASDVYGLS-----A  
GmPIN9c 42.9% -----MKHESI-----AKKKGGE-----AKKKGGE  
GmPIN9d 44.6% NHLNSGVKHESI-----AKKKGGE-----AKKKGGE  
GmPIN9a 46.0% -----SFMTPRPSNLTGAEIYSLQSSRNPTPRGSSFNHDFYSMMAAGGRNSNFGASDVYGLS-----A  
GmPIN9b 26.7% -----SFMTPRPSNLTGAEIYSLQSSRNPTPRGSSFNHDFYSMMAAGGRNSNFGASDVYGLS-----A  
consensus/100% SKGATPRTSNFEEMLKMKHKKRGRSSMSELFNGLVSSN---YPPNPMPFSGTSA-----GGP

GmPIN2a 100.0% KKDDSGGGGAAAPNTNLELHMVFSSSSASPVSEGLRHRHVNRAASTDFGTVDPSKAVPHETVASKAVHELINENSPGRRNGDQRELMDEGAKFAISG  
GmPIN2b 96.7% KKDDSGGGGAVPNTNLELHMVFSSSSASPVSEGLRHRHVNRAASTDFGTVDPSKAVPHETVASKAVHELINENSPGRRNGDREPEMDEGAKIPASG  
GmPIN1b 55.9% NAKRPNQAQLKLEDGNDLHMFVSSSSASPVSDVF-----GAHEYGG-HDQ-----KEVKLVNPSGKVEN--HRDQTQEDYL-EKDEF SFGNRGM  
GmPIN1c 56.3% NAKRPNQAQLKLEDGNDLHMFVSSSSASPVSDVF-----GAHEYGGHDQ-----KEVKLVNPSGKVEN--HRDQTQEDYL-EKDEF SFGNRGM  
GmPIN1a 55.7% -----KKDDPNKDLHMFVSSSSASPVSDVF-----GAHEYGGHDQ-----KELKLVSPGKVEGNINRDQTQEDYL-EKDEF SFGNRGI  
GmPIN1d 54.6% -----KGGEGGGGDLHMFVSSSSASPVSEGI-----HVFRGGGG-----DYGSDQLPVGVAHQKDYDFEG--HDEF SFGNRTV  
GmPIN1e 52.5% -----SGGGGGGGDLHMFVSSSSASPVSEGI-----HAFRGGG-----DYGSDQLPVGVAHQKDYDFEG--HDEF SFGNRTI  
GmPIN3a 53.5% PQVAQPAANSGNKSHDAKELHMFVSSSSASPVSEAGGLHVFSGADFASDQSGRSRQGAKEIRMLVADD--HFQNGETN-KAAAEFGEGEELKFPKAGE  
GmPIN3b 53.9% PQVAQPAANSGNKSHDAKELHMFVSSSTSPVSEAGGLHVFSGADFASDQSGRSRQGAKEIRMLVADD--HFQNGETN-KAAAEFGEGEELKFPKAGE  
GmPIN3c 50.8% -----KCAHDAKELHMFVSSSSASPVSEAGLNVFSSDTLGTSEQPDQG--AKEIRMLVADNNAHLRNGEANNKGGLEAVLGVDEDFKFFVNGG  
GmPIN3d 54.7% -----NCAHDAKELHMFVSSSSASPVSEAGLNVFGNTELGTSQQPDQGG--AKEIRMLVADNNAHLRNGEANNKGGLEAGLDVEEFKFFVNGG  
GmPIN8a 27.8% -----ARTFVVVPPSQDTPDSESS-----  
GmPIN8b 27.5% -----ARTFVVVPPSQDTPDSESS-----  
GmPIN8c 28.9% -----KRFPTAAASSQGGSC-----  
GmPIN8d 28.9% -----KRFPTAAASSQGGSC-----  
GmPIN6a 38.6% -----AGTFVGRSPVAGRVCRSSPVARVW-----ESPQKGLGDKRQCGCKDI  
GmPIN6b 43.3% -----ASTVWGRSPVAGRCQSSPVARVW-----GSPQKGLGVERQCGCKDI  
GmPIN5a 24.5% -----TTTATLKPAPKTMINDSEGGGKVEAT-----  
GmPIN5b 23.9% -----TTTATLKPAPKTMINKEGGGKVEA-----  
GmPIN9c 42.9% -----DTSSPKVIEDKEVKVIGCIQYPLSKGPK-----  
GmPIN9d 44.6% -----DMSPLKAMGKVEGVNWNVOYPLSEGLK-----  
GmPIN9a 46.0% -----EQTAVHELREIREGHEPVLGRRRLSLI-----  
GmPIN9b 26.7% -----NGAFLNKDCHEVVFVSSSTSSPDSVNY-----TKHGVRVSGSADGTIETSEKVVLDLYHT  
consensus/100% .....

GmPIN2a 100.0% SPFYTCQN-----QRKVDMEGNNANKNQMPASVMTLRLLMVWRKLRNPNTYSSILGLAWSISFVWHIEMPTVWKSISITL  
GmPIN2b 96.7% SPFYTCQN-----QRKVDMEGNNANKNQMPASVMTLRLLMVWRKLRNPNTYSSILGLAWSISFVWHIEMPTVWKSISITL  
GmPIN1b 55.9% DRENN-----QLEGEKVGDKG--PMTMPPASVMTLRLLMVWRKLRNPNTYSSILGLAWSISFVWHIEMPTVWKSISITL  
GmPIN1c 56.3% DRENN-----QLEGEKVGDKG--PMTMPPASVMTLRLLMVWRKLRNPNTYSSILGLAWSISFVWHIEMPTVWKSISITL  
GmPIN1a 55.7% EDEH-----EKEKVGNGN--PMTMPPASVMTLRLLMVWRKLRNPNTYSSILGLAWSISFVWHIEMPTVWKSISITL  
GmPIN1d 54.6% ANGVDKEGP-----VLSKLGSSSTAELRPKQAQGAK--PMSMPPASVMTLRLLMVWRKLRNPNTYSSILGLAWSISFVWHIEMPTVWKSISITL  
GmPIN1e 52.5% ANGVDKEGP-----VLSKLGSSSTAELRPKQAQGAK--PMSMPPASVMTLRLLMVWRKLRNPNTYSSILGLAWSISFVWHIEMPTVWKSISITL  
GmPIN3a 53.5% EQAEEEGKK--AGPAGLNKLGSSSTAELRPKAAVAG--AGKMPPASVMTLRLLMVWRKLRNPNTYSSILGLAWSISFVWHIEMPTVWKSISITL  
GmPIN3b 53.9% EQAEEEGKK--AGPAGLNKLGSSSTAELRPKAAVAV--AGKMPPASVMTLRLLMVWRKLRNPNTYSSILGLAWSISFVWHIEMPTVWKSISITL  
GmPIN3c 50.8% EQVGEKEE--GLNGLNKLKLGSSSTAELRPKTAAGEASAG--KMPPANVMTLRLLMVWRKLRNPNTYSSILGLAWSISFVWHIEMPTVWKSISITL  
GmPIN3d 54.7% EQVVEEKEKEKELNGLNKLKLGSSSTAELRPKAAALAAPAS--KMPPASVMTLRLLMVWRKLRNPNTYSSILGLAWSISFVWHIEMPTVWKSISITL  
GmPIN8a 27.8% -----LEISKEEBEE--AHRKQSKIRMLLIVGKLRNPNTYSSILGLAWSISFVWHIEMPTVWKSISITL  
GmPIN8b 27.5% -----LEISKEEBEE--AHRKQSKIRMLLIVGKLRNPNTYSSILGLAWSISFVWHIEMPTVWKSISITL  
GmPIN8c 28.9% -----REVQSKREEDA--SPRIKRRKRVLLILVWVKLRNPNTYSSILGLAWSISFVWHIEMPTVWKSISITL  
GmPIN8d 28.9% -----REVQSKREEDA--SPRIKRRKRVLLILVWVKLRNPNTYSSILGLAWSISFVWHIEMPTVWKSISITL  
GmPIN6a 38.6% -----MSDKIEISFR-----TMSGACLSDLFIS-----SCVWMLMPSLILKASVITL  
GmPIN6b 43.3% -----MSDKIEISFR-----DSTKVSQADPDLVASSQKPHFVWVHRLILVWVKLRNPNTYSSILGLAWSISFVWHIEMPTVWKSISITL  
GmPIN5a 24.5% -----VVAIDVEMMLEBSVTSRILPECKVLRNPNTYSSILGLAWSISFVWHIEMPTVWKSISITL  
GmPIN5b 23.9% -----VDVKEEMLEBSVTSRILPECKVLRNPNTYSSILGLAWSISFVWHIEMPTVWKSISITL  
GmPIN9c 42.9% -----BVKIEKDAYKKQ--MHRASVVMVRLILVWVKLRNPNTYSSILGLAWSISFVWHIEMPTVWKSISITL  
GmPIN9d 44.6% -----BEKIEEDYAYKKQ--QMPRSVVMVRLILVWVKLRNPNTYSSILGLAWSISFVWHIEMPTVWKSISITL  
GmPIN9a 46.0% -----BEDDGNKQMPRVSVMILILVWVKLRNPNTYSSILGLAWSISFVWHIEMPTVWKSISITL  
GmPIN9b 26.7% -----KLLPQKMMG-----VCPYFAYFVILDVDITLISLDELRYTRVFNMLLRNPNTYSSILGLAWSISFVWHIEMPTVWKSISITL  
consensus/100% .....

GmPIN2a 100.0% SDAGLGMAFPSLGLFMAQPKLIACGNSVAAFSAVRFVAGPAVIAATSGVGLRGVLLVAVTQAAALPQIVFVFVAEYVNHADILSTVIFGMILIAL  
GmPIN2b 96.7% SDAGLGMAFPSLGLFMAQPKLIACGNSVAAFSAVRFVAGPAVIAATSGVGLRGVLLVAVTQAAALPQIVFVFVAEYVNHADILSTVIFGMILIAL  
GmPIN1b 55.9% SDAGLGMAFPSLGLFMAQPRVIACGNSVAAFSAVRFVAGPAVMAAASVAVGLRGVLLVAVTQAAALPQIVFVFVAEYVNHADILSTVIFGMILIAL  
GmPIN1c 56.3% SDAGLGMAFPSLGLFMAQPRVIACGNSVAAFSAVRFVAGPAVMAAASVAVGLRGVLLVAVTQAAALPQIVFVFVAEYVNHADILSTVIFGMILIAL  
GmPIN1a 55.7% SDAGLGMAFPSLGLFMAQPRVIACGNSVAAFSAVRFVAGPAVMAAASVAVGLRGVLLVAVTQAAALPQIVFVFVAEYVNHADILSTVIFGMILIAL  
GmPIN1d 54.6% SDAGLGMAFPSLGLFMAQPKLIACGNSVAAFSAVRFVAGPAVMAAASVAVGLRGVLLVAVTQAAALPQIVFVFVAEYVNHADILSTVIFGMILIAL  
GmPIN1e 52.5% SDAGLGMAFPSLGLFMAQPKLIACGNSVAAFSAVRFVAGPAVMAAASVAVGLRGVLLVAVTQAAALPQIVFVFVAEYVNHADILSTVIFGMILIAL  
GmPIN3a 53.5% SDAGLGMAFPSLGLFMAQPKLIACGNSVAAFSAVRFVAGPAVMAAASVAVGLRGVLLVAVTQAAALPQIVFVFVAEYVNHADILSTVIFGMILIAL  
GmPIN3b 53.9% SDAGLGMAFPSLGLFMAQPKLIACGNSVAAFSAVRFVAGPAVMAAASVAVGLRGVLLVAVTQAAALPQIVFVFVAEYVNHADILSTVIFGMILIAL  
GmPIN3c 50.8% SDAGLGMAFPSLGLFMAQPRVIACGNSVAAFSAVRFVAGPAVMAAASVAVGLRGVLLVAVTQAAALPQIVFVFVAEYVNHADILSTVIFGMILIAL  
GmPIN3d 54.7% SDAGLGMAFPSLGLFMAQPKLIACGNSVAAFSAVRFVAGPAVMAAASVAVGLRGVLLVAVTQAAALPQIVFVFVAEYVNHADILSTVIFGMILIAL  
GmPIN8a 27.8% ASGGLGMAFPSLGLFMASSNRVITCCGRNTLVAMGLKFGPAIMAVASVIGLGRDLKVAITQAAALPQIVFVFVAEYVNHADILSTVIFGMILIAL  
GmPIN8b 27.5% ASGGLGMAFPSLGLFMASSNRVITCCGRNTLVAMGLKFGPAIMAVASVIGLGRDLKVAITQAAALPQIVFVFVAEYVNHADILSTVIFGMILIAL  
GmPIN8c 28.9% SNQGLGMAFPSLGLFMASSNTIACCPKRTVMVGLKVVGPALMAVASVIGLGRDLKVAITQAAALPQIVFVFVAEYVNHADILSTVIFGMILIAL  
GmPIN8d 28.9% SNQGLGMAFPSLGLFMASSNTIACCPKRTVMVGLKVVGPALMAVASVIGLGRDLKVAITQAAALPQIVFVFVAEYVNHADILSTVIFGMILIAL  
GmPIN5a 38.6% SDAGLGMAFPSLGLFMAQPRVIACGNSVAAFSAVRFVAGPAVMAAASVAVGLRGVLLVAVTQAAALPQIVFVFVAEYVNHADILSTVIFGMILIAL  
GmPIN5b 43.3% SDAGLGMAFPSLGLFMAQPRVIACGNSVAAFSAVRFVAGPAVMAAASVAVGLRGVLLVAVTQAAALPQIVFVFVAEYVNHADILSTVIFGMILIAL  
GmPIN5a 24.5% SKGAGGMAFPSLGLFMAQPKLIACGNSMTLIGLVKRFVAGPAATAGAVLGLGDVLRVITQAAALPQIVFVFVAEYVNHADILSTVIFGMILIAL  
GmPIN5b 23.9% SKGAGGMAFPSLGLFMAQPKLIACGNSMTLIGLVKRFVAGPAATAGAVLGLGDVLRVITQAAALPQIVFVFVAEYVNHADILSTVIFGMILIAL  
GmPIN9c 42.9% SQFAGGMAFPSLGLFMAQPKLIACGNSAAMSVIARLGGPAVIGVTSVIGRGGVLLVAVTQAAALPQIVFVFVAEYVNHADILSTVIFGMILIAL  
GmPIN9d 44.6% SQFAGGMAFPSLGLFMAQPKLIACGNSVITISHVRFVAGPAVIAATSGVGLRGVLLVAVTQAAALPQIVFVFVAEYVNHADILSTVIFGMILIAL  
GmPIN9a 46.0% SHQGLGMAFPSLGLFMAQPKLIACGNSVITISHVRFVAGPAVIAATSGVGLRGVLLVAVTQAAALPQIVFVFVAEYVNHADILSTVIFGMILIAL  
GmPIN9b 26.7% SNQGLGMAFPSLGLFMAQPKLIACGNSVITISHVRFVAGPAVIAATSGVGLRGVLLVAVTQAAALPQIVFVFVAEYVNHADILSTVIFGMILIAL  
consensus/100% .....

GmPIN2a 100.0% PVTIYYVHLGL-----  
GmPIN2b 96.7% PVTIYYVHLGL-----  
GmPIN1b 55.9% PVTIYYVHLGL-----  
GmPIN1c 56.3% PVTIYYVHLGL-----  
GmPIN1a 55.7% PVTIYYVHLGL-----  
GmPIN1d 54.6% PVTIYYVHLGL-----  
GmPIN1e 52.5% PVTIYYVHLGL-----  
GmPIN3a 53.5% PVTIYYVHLGL-----  
GmPIN3b 53.9% PVTIYYVHLGL-----  
GmPIN3c 50.8% PVTIYYVHLGL-----  
GmPIN3d 54.7% PVTIYYVHLGL-----  
GmPIN8a 27.8% PVALYYVHLGLSY-----  
GmPIN8b 27.5% PVALYYVHLGLSY-----  
GmPIN8c 28.9% PVALYYVHLGLSY-----  
GmPIN8d 28.9% PVALYYVHLGLSY-----  
GmPIN6a 38.6% PVTIYYVHLGL-----  
GmPIN6b 43.3% PVTIYYVHLGL-----  
GmPIN5a 24.5% PVTIYYVHLGLSY-----  
GmPIN5b 23.9% PVTIYYVHLGLSY-----  
GmPIN9c 42.9% PVTIYYVHLGL-----  
GmPIN9d 44.6% PVTIYYVHLGL-----  
GmPIN9a 46.0% PVTIYYVHLGL-----  
GmPIN9b 26.7% PVTIYYVHLGL-----  
consensus/100% PhIha...hLth...
