# Supplementary material for: Genome-wide analysis and expression profiling of the PIN auxin transporter gene family in soybean (Glycine max)
Source: PubMed Central journal article supplement (PMC4647520; doi:10.1186/s12864-015-2149-1), 2015-11-16
Supplement: 12864_2015_2149_MOESM3_ESM.pdf [file 12864_2015_2149_MOESM3_ESM.pdf]

**Table S2 Protein sequences used in the phylogenetic analysis**

| Species                   | PINs    | ID number <sup>a</sup> | Other name [16, 20] |
|---------------------------|---------|------------------------|---------------------|
| <i>Glycine max</i>        |         |                        |                     |
|                           | GmPIN1a | Glyma08g05900.1        |                     |
|                           | GmPIN1b | Glyma07g11550.1        |                     |
|                           | GmPIN1c | Glyma09g30700.1        |                     |
|                           | GmPIN1d | Glyma03g28130.2        |                     |
|                           | GmPIN1e | Glyma19g30900.2        |                     |
|                           | GmPIN2a | Glyma13g00390.1        |                     |
|                           | GmPIN2b | Glyma17g06460.1        |                     |
|                           | GmPIN3a | Glyma07g34190.2        |                     |
|                           | GmPIN3b | Glyma20g01760.1        |                     |
|                           | GmPIN3c | Glyma07g22340.2        |                     |
|                           | GmPIN3d | Glyma09g20580.1        |                     |
|                           | GmPIN5a | Glyma09g38700.2        |                     |
|                           | GmPIN5b | Glyma18g47630.1        |                     |
|                           | GmPIN6a | Glyma13g09030.1        |                     |
|                           | GmPIN6b | Glyma14g27900.1        |                     |
|                           | GmPIN8a | Glyma05g23180.1        |                     |
|                           | GmPIN8b | Glyma17g16870.2        |                     |
|                           | GmPIN8c | Glyma09g37561.1        |                     |
|                           | GmPIN8d | Glyma18g49080.1        |                     |
|                           | GmPIN9a | Glyma09g06970.2        |                     |
|                           | GmPIN9b | Glyma15g18241.1        |                     |
|                           | GmPIN9c | Glyma09g13500.1        |                     |
|                           | GmPIN9d | Glyma15g25690.1        |                     |
| <i>Phaseolus vulgaris</i> |         |                        |                     |
|                           | PvPIN1a | Phvul.002G330300.1     |                     |
|                           | PvPIN1b | Phvul.004G150600.1     |                     |
|                           | PvPIN1c | Phvul.011G164500.1     |                     |
|                           | PvPIN1d | Phvul.001G121100.1     |                     |
|                           | PvPIN2  | Phvul.003G139600.1     |                     |
|                           | PvPIN3a | Phvul.002G094000.1     |                     |
|                           | PvPIN3b | Phvul.003G032500.1     |                     |
|                           | PvPIN5  | Phvul.008G055200.1     |                     |
|                           | PvPIN6  | Phvul.001G063900.1     |                     |
|                           | PvPIN8a | Phvul.004G026500.1     |                     |
|                           | PvPIN8b | Phvul.008G043700.1     |                     |
|                           | PvPIN9a | Phvul.009G210900.1     |                     |
|                           | PvPIN9b | Phvul.009G234000.1     |                     |
|                           | PvPIN9c | Phvul.009G234100.1     |                     |

PvPIN9d Phvul.009G234200.1  
PvPIN9e Phvul.009G208200.1

***Medicago truncatula***

|         |                 |        |
|---------|-----------------|--------|
| MtPIN1a | Medtr6g069510.1 | MtPIN4 |
| MtPIN1b | Medtr8g107360.1 | MtPIN5 |
| MtPIN1c | Medtr7g089360.1 |        |
| MtPIN2a | Medtr4g127100.1 | MtPIN2 |
| MtPIN2b | Medtr4g127090.1 | MtPIN7 |
| MtPIN3a | Medtr4g084870.1 | MtPIN1 |
| MtPIN3b | Medtr1g030890.1 | MtPIN3 |
| MtPIN5a | Medtr7g079720.1 |        |
| MtPIN5b | Medtr2g038470.1 |        |
| MtPIN6  | Medtr1g029190.1 | MtPIN6 |
| MtPIN8a | Medtr6g011400.1 |        |
| MtPIN8b | Medtr7g009370.1 | MtPIN8 |

***Lotus japonicus***

|         |                       |
|---------|-----------------------|
| LjPIN1a | chr4.CM0042.2390.r2.m |
| LjPIN1b | chr1.CM0269.740.r2.m  |
| LjPIN2  | chr4.CM0244.800.r2.m  |
| LjPIN5  | chr1.CM1413.300.r2.m  |
| LjPIN8  | chr2.CM0081.1950.r2.m |

***Arabidopsis thaliana***

|        |             |
|--------|-------------|
| AtPIN1 | AT1G73590.1 |
| AtPIN2 | AT5G57090.1 |
| AtPIN3 | AT1G70940.1 |
| AtPIN4 | AT2G01420.2 |
| AtPIN5 | AT5G16530.1 |
| AtPIN6 | AT1G77110.1 |
| AtPIN7 | AT1G23080.1 |
| AtPIN8 | AT5G15100.1 |

***Oryza sativa***

|         |                  |
|---------|------------------|
| OsPIN1a | LOC_Os06g12610.1 |
| OsPIN1b | LOC_Os02g50960.1 |
| OsPIN1c | LOC_Os11g04190.1 |
| OsPIN1d | LOC_Os12g04000.1 |
| OsPIN2  | LOC_Os06g44970.1 |
| OsPIN5a | LOC_Os01g69070.1 |
| OsPIN5b | LOC_Os08g41720.1 |
| OsPIN5c | LOC_Os09g32770.1 |
| OsPIN8  | LOC_Os01g51780.1 |

|                        |          |                         |         |
|------------------------|----------|-------------------------|---------|
|                        | OsPIN9   | LOC_Os01g58860.1        |         |
|                        | OsPIN10a | LOC_Os01g45550.1        |         |
|                        | OsPIN10b | LOC_Os05g50140.1        |         |
| <i>Zea mays</i>        |          |                         |         |
|                        | ZmPIN1a  | GRMZM2G098643           |         |
|                        | ZmPIN1b  | GRMZM2G074267           |         |
|                        | ZmPIN1c  | GRMZM2G149184           |         |
|                        | ZmPIN1d  | GRMZM2G171702           |         |
|                        | ZmPIN2   | AZM5_105354 & AZM5_3988 |         |
|                        | ZmPIN5a  | GRMZM2G025742           |         |
|                        | ZmPIN5b  | GRMZM2G148648           |         |
|                        | ZmPIN5c  | GRMZM2G040911           |         |
|                        | ZmPIN8   | GRMZM5G839411           |         |
|                        | ZmPIN9   | GRMZM5G859099           |         |
|                        | ZmPIN10a | GRMZM2G126260           |         |
|                        | ZmPIN10b | GRMZM2G160496           |         |
| <i>Sorghum bicolor</i> |          |                         |         |
|                        | SbPIN1a  | Sb10g008290.1           | SbPIN10 |
|                        | SbPIN1b  | Sb04g028170.1           | SbPIN6  |
|                        | SbPIN1c  | Sb05g002150.1           | SbPIN7  |
|                        | SbPIN2   | Sb10g026300.1           | SbPIN11 |
|                        | SbPIN5a  | Sb03g043960.1           | SbPIN5  |
|                        | SbPIN5b  | Sb07g026370.1           | SbPIN8  |
|                        | SbPIN5c  | Sb02g029210.1           | SbPIN1  |
|                        | SbPIN8   | Sb03g032850.1           | SbPIN3  |
|                        | SbPIN9   | Sb03g037350.1           | SbPIN4  |
|                        | SbPIN10a | Sb03g029320.1           | SbPIN2  |
|                        | SbPIN10b | Sb10g004430.1           | SbPIN9  |

---

<sup>a</sup>Protein sequences from all plant species were retrieved from phytozome (V9.1) except *Lotus japonicus* (<http://www.kazusa.or.jp/lotus/>).
