# Supplementary material for: Genome-wide analysis and expression profiling of the PIN auxin transporter gene family in soybean (Glycine max)
Source: PubMed Central journal article supplement (PMC4647520; doi:10.1186/s12864-015-2149-1), 2015-11-16
Supplement: 12864_2015_2149_MOESM4_ESM.pdf [file 12864_2015_2149_MOESM4_ESM.pdf]

**Table S3 Primers used for qRT-PCR analysis**

| <b>Gene name</b> | <b>Locus ID</b> | <b>Forward primer (5'-3')</b> | <b>Reverse primer (5'-3')</b> |
|------------------|-----------------|-------------------------------|-------------------------------|
| <i>GmPIN1a</i>   | Glyma08g05900   | GCAACCGAGGATCATAGCAT          | AGAGAACGCCTTTGAGTCCA          |
| <i>GmPIN1b</i>   | Glyma07g11550   | TGTTGATTGCTTTGCCATA           | TGTCTGATGCTCAACAAGCC          |
| <i>GmPIN1c</i>   | Glyma09g30700   | ATGCAAAGCTTGTTGAGGT           | GATCCTGGGGTTCTTCTTCC          |
| <i>GmPIN1d</i>   | Glyma03g28130   | GCATAAAAAGTGGGACCGAA          | ATGACAACCTGTGCCATTCA          |
| <i>GmPIN1e</i>   | Glyma19g30900   | GGGATGCTAATTGCTCTTCCTA        | GGTAGTTTGATCCACACTGCAA        |
| <i>GmPIN2a</i>   | Glyma13g00390   | ATTGCATTGCCATAACCAT           | CGTGACCTTGGGTTTACGTT          |
| <i>GmPIN2b</i>   | Glyma17g06460   | ATTGCATTGCCATAACCAT           | CGTGACATTGGGTTTACATAG         |
| <i>GmPIN3a</i>   | Glyma07g34190   | AATAAAACCAGCCACGATGC          | ATCCGATGCTCCAAAATCAG          |
| <i>GmPIN3b</i>   | Glyma20g01760   | AGAATTCGCAGACACAGCCT          | GTTGGCTTTGTTCCCCTGT           |
| <i>GmPIN3c</i>   | Glyma07g22340   | GTGACGGTAGCTTCTCCTCG          | GAATTCTGGCTCTGGCTCTG          |
| <i>GmPIN3d</i>   | Glyma09g20580   | ACACTTGCAAATGGGGAAG           | GCCCAACTTGTTGAGTCCAT          |
| <i>GmPIN5a</i>   | Glyma09g38700   | ATCGTTGTAGGATTGCGAGG          | TCATACCAAAGATCACCGCA          |
| <i>GmPIN5b</i>   | Glyma18g47630   | GGTGCCATTGCTGTAGGATT          | TCATACCAAAGATCACCGCA          |
| <i>GmPIN6a</i>   | Glyma13g09030   | TGCAACTCGTGGTTCTTCAG          | CGTCGAATTCGCTATGGAT           |
| <i>GmPIN6b</i>   | Glyma14g27900   | AGTTCTTGACATGCCCTGCT          | TTCCCACAAGCTTTTCCAAC          |
| <i>GmPIN8a</i>   | Glyma05g23180   | AGCCGATGATCCAAGAGAGA          | ACAGCCATCCAATTCAAACA          |
| <i>GmPIN8b</i>   | Glyma17g16870   | TGTCCGAAGTGGACTGTTGA          | CAACCAACCTCCAGCAAACCT         |
| <i>GmPIN9d</i>   | Glyma15g25690   | GCCATCAATTGCAAAAGGTT          | GAACCGAGCCACCATAGAAA          |
| <i>GmUBI3</i>    | Glyma20g27950   | GTGTAATGTTGGATGTGTTCCC        | ACACAATTGAGTTCAACACAAACCG     |
