# Supplementary material for: Genome-wide analysis and expression profiling of the PIN auxin transporter gene family in soybean (Glycine max)
Source: PubMed Central journal article supplement (PMC4647520; doi:10.1186/s12864-015-2149-1), 2015-11-16
Supplement: 12864_2015_2149_MOESM5_ESM.pdf [file 12864_2015_2149_MOESM5_ESM.pdf]

**Table S4 Primers used for *GmPINs* gene promoter cloning**

| <b>Gene name</b> | <b>Locus ID</b> | <b>Forward primer (5'-3')</b> | <b>Reverse primer (5'-3')</b> | <b>Fragment length (bp)</b> |
|------------------|-----------------|-------------------------------|-------------------------------|-----------------------------|
| <i>GmPIN1b</i>   | Glyma07g11550   | ATTTGTGGGTTTGTGAGGT           | TGTAATTGAAGAATGGTGTA AAAAG    | 2511                        |
| <i>GmPIN1c</i>   | Glyma09g30700   | AGAAAGATGATAGAAAGCAGAAGAG     | GAGAGAACA AAAAAAATGT TAAAGGA  | 2763                        |
| <i>GmPIN1e</i>   | Glyma19g30900   | GCTTCCATCAAACCCTTTG           | TGTCGTGTCTCTTTCCGAATA         | 2887                        |
| <i>GmPIN2a</i>   | Glyma13g00390   | GTTTCATGCGGGGTTTGT            | CGATTGAGGAAGTAGTCCTTT         | 1938                        |
| <i>GmPIN2b</i>   | Glyma17g06460   | AAGGATTGGGTTTATGGATTAG        | GGTTAATGCAGGGTTTGTAG          | 2721                        |
| <i>GmPIN3a</i>   | Glyma07g34190   | AAGGACCCATGAAACAATAATT        | TTTGCCTTTTTCTTAATTTCTAAA      | 3439                        |
| <i>GmPIN3b</i>   | Glyma20g01760   | TTCCCTAAGATTCCTCAAGCTT        | TTTCCCCTTTCTCTTAATTTCTC       | 3368                        |
| <i>GmPIN6a</i>   | Glyma13g09030   | GAGAGAAAATTACTAAGTGTGTTTGG    | AGAAGGAATAAAAATTGGAAAATAATAA  | 2969                        |
| <i>GmPIN6b</i>   | Glyma14g27900   | GAAACATCAC AACAGAGACAGA       | CTCGAGAGAGAATTTTTATAGTGTATTT  | 3486                        |
| <i>GmPIN9d</i>   | Glyma15g25690   | GTGACAGCGAGAGATCGAA           | GAAGATGATAGGTACAAGTTAAAGA     | 2132                        |
